# Supplementary material for: Novel COX11 Mutations Associated with Mitochondrial Disorder: Functional Characterization in Patient Fibroblasts and Saccharomyces cerevisiae
Source: MDPI journal article supplement (doi:10.3390/ijms242316636), 2023-11-23
Supplement: s1 [file s1]

**Supplementary Table S1**

Plasma amino acids and urine organic acids alterations in our case at the age of 23 months.

|                            | <b>This case</b> | <b>Normal value</b> |
|----------------------------|------------------|---------------------|
| <b>Plasma amino acids</b>  |                  |                     |
| Alanine                    | 520 umol/l       | 167-389             |
| Valine                     | 381.33 umol/l    | 140-302             |
| Isoleucine                 | 100.26 umol/l    | 31-88               |
| <b>Urine organic acids</b> |                  |                     |
| Lactate                    | 235 umol/mmol    | < 50                |
| Pyruvate                   | 305 µmol/mmol    | < 20                |
| Ethylmalonic acid          | 39 µmol/mmol     | < 20                |
| Succinic acid              | 98 µmol/mmol     | < 20                |
| Fumaric acid               | 118 µmol/mmol    | < 10                |
| Glutaric acid              | 202 µmol/mmol    | < 10                |
| 2-OH-glutaric acid         | 165 µmol/mmol    | < 20                |
| Ketoglutaric acid          | 1200 µmol/mmol   | < 120               |

## Supplementary Table S2

*In silico* pathogenicity predictions for *COX11* mutation c.739C>A (p.P247T)

| <b><i>In silico</i> tool</b> | <b>Predictions</b>        |
|------------------------------|---------------------------|
| CADD                         | deleterious (26.1)        |
| MetaRNN                      | damaging (0.8927)         |
| REVEL                        | pathogenic (0.5889)       |
| PolyPhen-2                   | probably damaging (0.999) |
| SIFT                         | damaging (0.003)          |
| MutationTaster               | disease causing (1)       |
| EIGEN                        | pathogenic (0.8179)       |

CADD (<http://cadd.gs.washington.edu/>); MetaRNN (<http://www.liulab.science/metarnn.html>)

REVEL (<https://sites.google.com/site/revelgenomics/>); PolyPhen-2

(<http://genetics.bwh.harvard.edu/pph2>); SIFT (<https://sift.bii.a-star.edu.sg/index.html>); Mutation

Taster (<http://www.mutationtaster.org>); EIGEN (<http://www.columbia.edu/~ii2135/eigen.html>).

**Supplementary Table S3**

Spectrophotometric determination of RC activities in patient skeletal muscle

| Enzyme                                                 | Activity     | Normal Range          |
|--------------------------------------------------------|--------------|-----------------------|
| NADH:ubiquinone oxidoreductase<br>(Complex I)          | 25.06 (2.01) | 27.5-39.5 (1.56-2.60) |
| Succinate dehydrogenase<br>(Complex II)                | 1.82 (0.15)  | 1.2-2.0 (0.05-0.105)  |
| NADH cytochrome c oxidoreductase<br>(Complexes I+III)  | 2.14 (0.17)  | 0.65-1.50 (0.11-0.25) |
| Succinate cytochrome c reductase<br>(Complexes II+III) | 0.56 (0.04)  | 0.45-0.90 (0.05-0.08) |
| Cytochrome c oxidase<br>(Complex IV)                   | 2.89 (0.23)  | 1.80-2.45 (0.17-0.28) |
| Citrate synthase<br>(CS)                               | 12.44        | 8.91-15.00            |

Activities are expressed in nmol/min/gr tissue. In brackets the values normalized to the activity of CS
